# Supplementary material
Source: PubMed Central journal article supplement (PMC7210897)
Supplement: 42003_2020_955_MOESM2_ESM.pdf [file 42003_2020_955_MOESM2_ESM.pdf]

## **Description of Additional Supplementary Files**

**File Name:** **Supplementary Data 1**

**Description:** Raw data for all presented data in the main Figures 1-6 and Supplementary Figures 1-12.
