# Supplementary material
Source: PubMed Central journal article supplement (PMC7210897)
Supplement: 42003_2020_955_MOESM4_ESM.pdf [file 42003_2020_955_MOESM4_ESM.pdf]

**Editorial Note:** *This manuscript has been previously reviewed at another Nature Research journal. This document only contains reviewer comments and rebuttal letters for versions considered at Communications Biology*

REVIEWERS' COMMENTS:

Reviewer #1 (Remarks to the Author):

The authors have addressed all of my previous concerns.

Reviewer #2 (Remarks to the Author):

The authors have satisfactorily addressed my previous concerns.
